# Supplementary material for: Genome-wide association study identifies loci for arterial stiffness index in 127,121 UK Biobank participants
Source: PubMed Central journal article supplement (PMC6591384; doi:10.1038/s41598-019-45703-0), 2019-06-24
Supplement: 41598_2019_45703_MOESM1_ESM.pdf [file 41598_2019_45703_MOESM1_ESM.pdf]

## **SUPPLEMENTARY INFORMATION**

### **Genome-wide association study identifies loci for arterial stiffness index in 127,121 UK Biobank participants**

Kenneth Fung, Julia Ramírez, Helen R. Warren, Nay Aung, Aaron M. Lee, Evan Tzanis, Steffen E. Petersen and Patricia B. Munroe

**Supplementary Figures S1-S5**

**Supplementary Tables S1-S5**

**Supplementary Figure S1** Participant phenotype selection flow chart

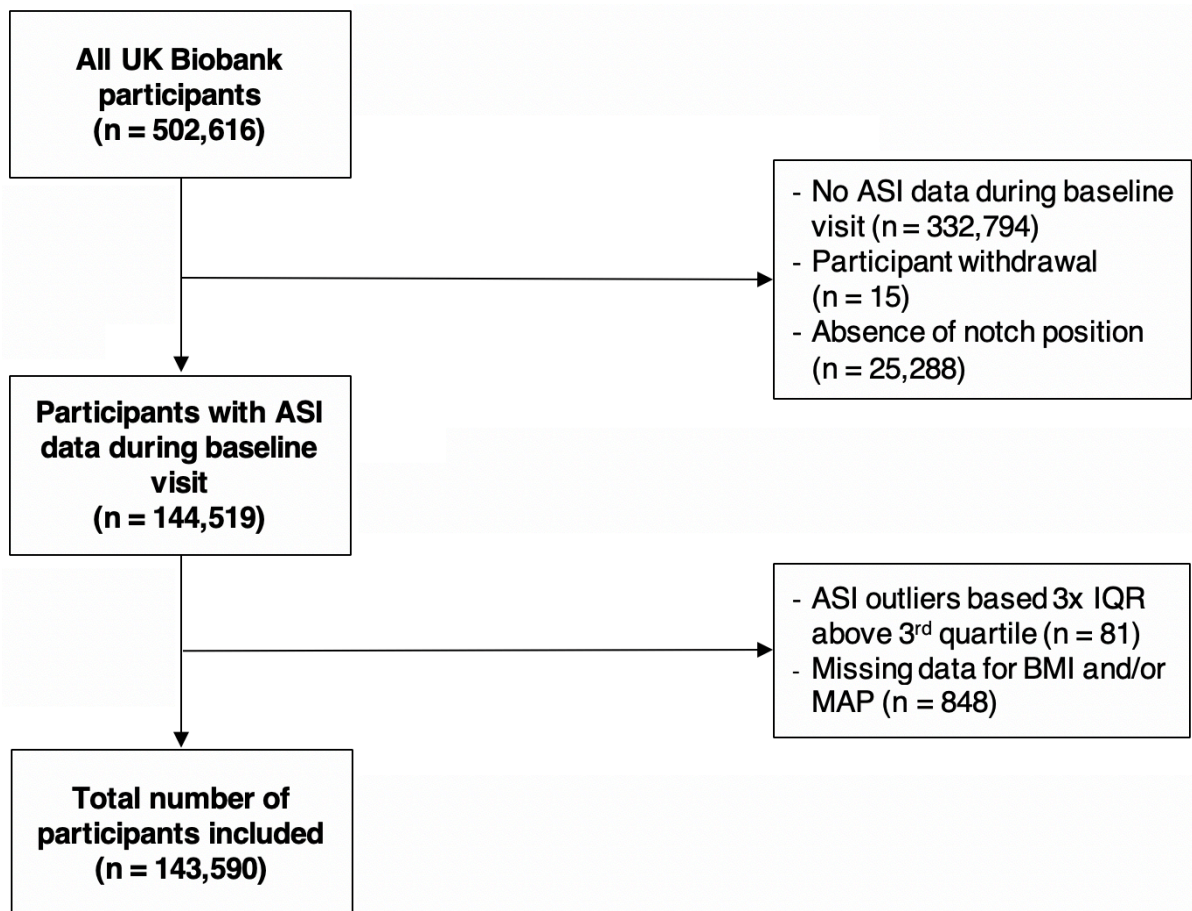

ASI = aortic stiffness index; IQR = interquartile range; MAP = mean arterial pressure; BMI = body mass index.

**Supplementary Figure S2** Quantile-quantile (QQ) plots of observed against expected  $P$ -values for ASI in our primary (left) and secondary (right) models. The genomic inflation factor ( $\lambda$ ) value for both is 1.097.

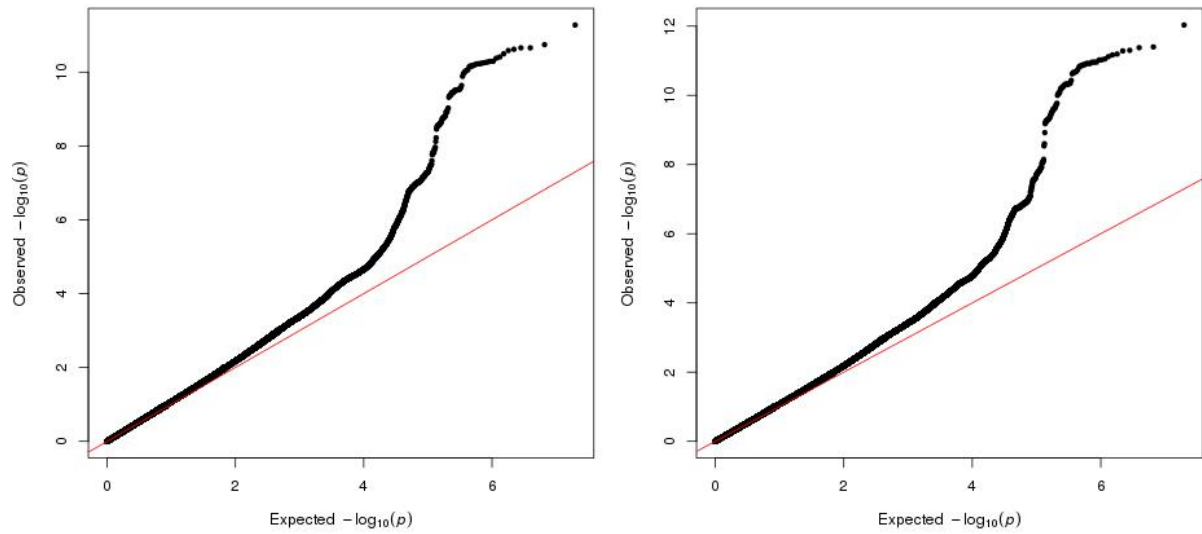

**Supplementary Figure S3** Manhattan plot of the results of GWAS with ASI in the secondary model. The red line indicates the  $P$ -value threshold for genome-wide significance ( $P < 5 \times 10^{-8}$ ) while the blue line indicates  $P$ -value threshold for suggestive significance ( $P < 1 \times 10^{-5}$ ).

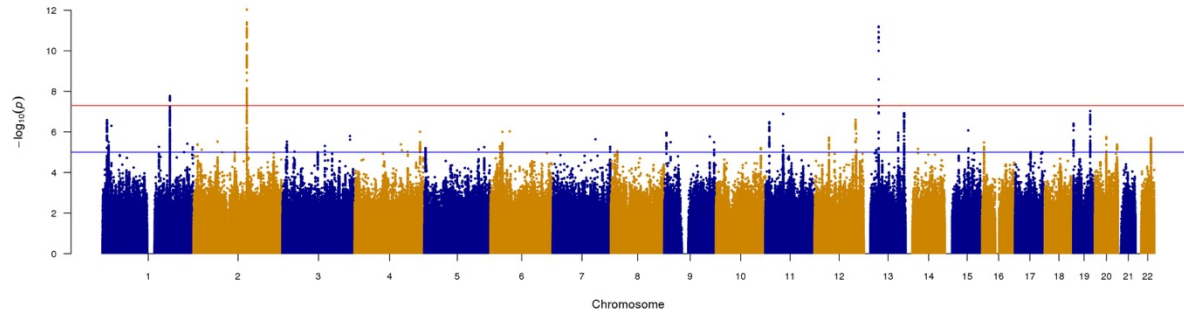

**Supplementary Figure S4** Gene-based Manhattan plot of genetic associations with ASI in the primary model. The red dashed line indicates the  $P$ -value threshold ( $2.67 \times 10^{-6}$ ).

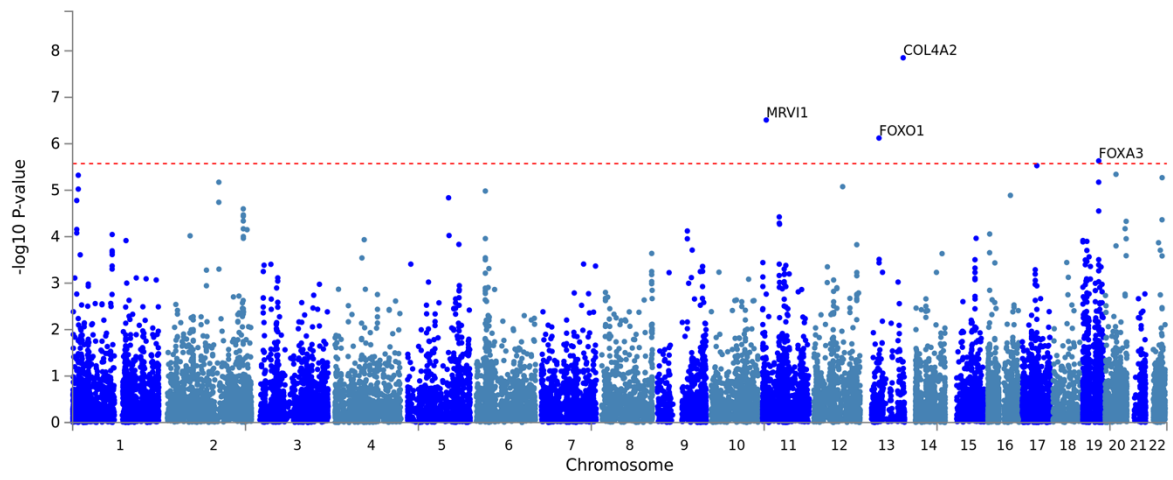

**Supplementary Figure S5** Quantile-quantile (QQ) plots of observed ASI against predicted values (left) and observed residuals (from linear regression of ASI) against predicted values (right).

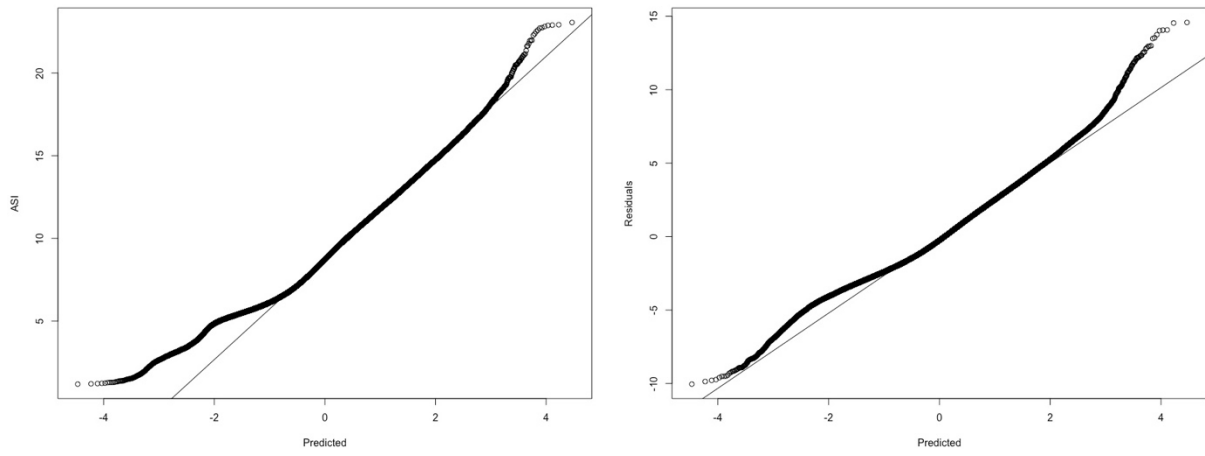

**Supplementary Table S1** Baseline characteristics of the 127,121 individuals included in the GWAS analyses. Continuous variables displayed as mean (standard deviation) and categorical data are presented as numbers of participants (percentages)

| <b>Parameter</b>                 | <b>Study group</b> |
|----------------------------------|--------------------|
| Age (years)                      | 56 (8.1)           |
| Males                            | 61,199 (48.1)      |
| Height (cm)                      | 170 (9.2)          |
| Weight (kg)                      | 79 (16.0)          |
| UK BiLEVE genetic array          | 13,326 (10.5)      |
| Systolic blood pressure (mmHg)*  | 140 (20.3)         |
| Diastolic blood pressure (mmHg)* | 84 (11.2)          |
| Mean arterial pressure (mmHg)*   | 102 (13.4)         |
| Current smokers                  | 8,555 (6.7)        |
| Anti-hypertensive medications    | 24,264 (19.1)      |
| Arterial stiffness index (m/s)   | 9.0 (2.7)          |

\*adjusted by adding 15mmHg to systolic blood pressure and 10mmHg to diastolic blood pressure respectively in the presence of anti-hypertensive medications

**Supplementary Table S2a** Summary of loci associated with arterial stiffness index in the secondary model (excluding mean arterial pressure).

| Locus   | SNV       | CHR | BP        | EA | EAF   | P       | $\beta$ | SE    |
|---------|-----------|-----|-----------|----|-------|---------|---------|-------|
| C1orf21 | rs1930290 | 1   | 184272584 | T  | 0.553 | 1.7E-08 | -0.023  | 0.004 |
| TEX41   | rs1006923 | 2   | 145775399 | T  | 0.677 | 9.3E-13 | 0.030   | 0.004 |
| FOXO1   | rs7331212 | 13  | 41185309  | G  | 0.737 | 6.4E-12 | 0.031   | 0.005 |

Locus is name of the gene in the closest proximity to the most associated SNV.

MAP = mean arterial pressure; SNV = single-nucleotide variant; CHR = chromosome; BP = base pair position (hg19); EA = effect allele; EAF = effect allele frequency; P = *P*-value;  $\beta$  = effect-size estimates on an inverse-normal transformed scale; SE = standard error

**Supplementary Table S2b** Summary of loci associated with arterial stiffness index using untransformed ASI values

| Locus   | SNV       | CHR | BP        | EA | EAF   | P       | $\beta$ | SE    |
|---------|-----------|-----|-----------|----|-------|---------|---------|-------|
| C1orf21 | rs1930290 | 1   | 184272584 | T  | 0.553 | 5.1E-09 | -0.057  | 0.010 |
| TEX41   | rs1006923 | 2   | 145775399 | T  | 0.677 | 1.9E-11 | 0.070   | 0.010 |
| FOXO1   | rs7331212 | 13  | 41185309  | G  | 0.737 | 2.0E-11 | 0.074   | 0.010 |
| RSPH6A  | rs8107744 | 19  | 46300848  | C  | 0.174 | 1.4E-08 | -0.072  | 0.013 |

Locus is name of the gene in the closest proximity to the most associated SNV.

MAP = mean arterial pressure; SNV = single-nucleotide variant; CHR = chromosome; BP = base pair position (hg19); EA = effect allele; EAF = effect allele frequency; P = *P*-value;  $\beta$  = effect-size estimates; SE = standard error



**Supplementary Table S3** Loci with suggestive genome-wide significant associations with arterial stiffness index in the primary model ( $P < 1 \times 10^{-5}$ )

| Locus            | SNV                            | CHR | BP        | EA | EAF   | P       | $\beta$ | SE    |
|------------------|--------------------------------|-----|-----------|----|-------|---------|---------|-------|
| CLCN6            | rs17037452                     | 1   | 11895675  | A  | 0.837 | 9.4E-06 | 0.024   | 0.005 |
| HSPB7            | rs10927886                     | 1   | 16339313  | C  | 0.603 | 6.1E-06 | 0.018   | 0.004 |
| FUCA1            | rs149320025                    | 1   | 24167754  | G  | 0.466 | 4.0E-07 | -0.088  | 0.017 |
| DISC1            | rs146306327                    | 1   | 231909297 | A  | 0.988 | 5.3E-06 | 0.094   | 0.021 |
| NOL10            | rs56047999                     | 2   | 10673316  | C  | 0.876 | 4.5E-06 | 0.028   | 0.006 |
| -                | 2:65642586_<br>TA_T            | 2   | 65642586  | -  | 0.314 | 3.9E-06 | 0.020   | 0.004 |
| ACVR2A           | rs151062078                    | 2   | 148687924 | -  | 0.545 | 3.6E-06 | 0.019   | 0.004 |
| -                | 2:219518298<br>_CA_C           | 2   | 219518298 | -  | 0.429 | 6.3E-06 | -0.018  | 0.004 |
| BRK1             | rs112279447                    | 3   | 10163420  | C  | 0.907 | 8.7E-06 | 0.031   | 0.007 |
| PPARG            | rs17036160                     | 3   | 12329783  | C  | 0.882 | 3.9E-06 | 0.028   | 0.006 |
| SUSD5            | rs7635223                      | 3   | 33204539  | T  | 0.151 | 8.4E-06 | 0.025   | 0.006 |
| TUSC7            | rs13086352                     | 3   | 116318189 | G  | 0.767 | 7.2E-06 | -0.021  | 0.005 |
| MAP3K13          | rs142358937                    | 3   | 185145325 | C  | 0.988 | 1.1E-06 | -0.093  | 0.019 |
| -                | 4:126534859<br>_GACAA_G        | 4   | 126534859 | -  | 0.885 | 2.4E-06 | -0.029  | 0.006 |
| JADE1            | rs17013444                     | 4   | 129474098 | T  | 0.904 | 5.6E-06 | 0.031   | 0.007 |
| -                | 4:145463573<br>_CA_C           | 4   | 145463573 | -  | 0.824 | 9.3E-06 | -0.024  | 0.005 |
| -                | 4:178961198<br>_CCCA_C         | 4   | 178961198 | -  | 0.748 | 8.1E-07 | 0.023   | 0.005 |
| C5orf38          | rs1494071                      | 5   | 2947267   | G  | 0.719 | 9.5E-06 | 0.020   | 0.004 |
| LOC10254<br>6299 | rs149475046                    | 5   | 163929545 | T  | 0.829 | 7.5E-06 | 0.024   | 0.005 |
| DDR1             | rs9501489                      | 6   | 30783242  | G  | 0.981 | 4.0E-06 | 0.067   | 0.014 |
| MICB             | rs9267235                      | 6   | 31455525  | T  | 0.954 | 7.3E-06 | 0.044   | 0.010 |
| HLA-DRB1         | rs2858863                      | 6   | 32578278  | C  | 0.796 | 5.3E-06 | 0.023   | 0.005 |
| GSTA4            | rs11444456                     | 6   | 52849481  | C  | 0.537 | 9.3E-07 | 0.023   | 0.005 |
| IPCEF1           | rs118124932                    | 6   | 154633543 | C  | 0.964 | 6.5E-06 | 0.049   | 0.011 |
| -                | 7:116506240<br>_CT_C           | 7   | 116506240 | -  | 0.891 | 2.8E-06 | -0.034  | 0.007 |
| -                | 8:17485159_<br>ATTTTATAG_<br>A | 8   | 17485159  | -  | 0.922 | 8.4E-06 | 0.033   | 0.008 |
| KIAA1432         | rs55850360                     | 9   | 5605535   | G  | 0.888 | 7.3E-07 | -0.031  | 0.006 |
| BNC2             | rs201551585                    | 9   | 16900623  | C  | 0.989 | 4.3E-06 | 0.091   | 0.020 |
| DAB2IP           | rs7032907                      | 9   | 124332500 | T  | 0.505 | 5.0E-06 | -0.019  | 0.004 |
| ABO              | rs9411377                      | 9   | 136145404 | C  | 0.702 | 9.7E-06 | 0.020   | 0.004 |
| OR4A47           | rs371147897                    | 11  | 48531667  | -  | 0.342 | 1.6E-07 | -0.022  | 0.004 |
| CPNE8            | rs7979541                      | 12  | 39129679  | T  | 0.550 | 3.1E-06 | 0.019   | 0.004 |
| LINC01234        | rs41334252                     | 12  | 114134157 | C  | 0.768 | 9.3E-07 | 0.023   | 0.005 |
| GPC6             | rs9524452                      | 13  | 95003486  | G  | 0.712 | 1.2E-06 | -0.021  | 0.004 |
| COL4A2           | rs9521719                      | 13  | 111017784 | G  | 0.596 | 1.1E-07 | 0.022   | 0.004 |
| NPAS3            | rs2383522                      | 14  | 34144830  | T  | 0.415 | 7.6E-06 | 0.018   | 0.004 |
| DAPK2            | rs55994383                     | 15  | 64342914  | T  | 0.487 | 1.4E-06 | -0.019  | 0.004 |
| SEC14L5          | rs62036174                     | 16  | 5015936   | G  | 0.561 | 6.3E-06 | -0.018  | 0.004 |
| RNF126           | rs4919881                      | 19  | 656701    | T  | 0.155 | 8.0E-07 | 0.027   | 0.005 |
| RSPH6A           | rs8107744                      | 19  | 46300848  | C  | 0.174 | 1.2E-07 | -0.028  | 0.005 |
| COMMD7           | rs780332590                    | 20  | 31292298  | -  | 0.209 | 2.7E-06 | 0.025   | 0.005 |
| LSM14B           | rs6121900                      | 20  | 60694077  | G  | 0.155 | 6.7E-06 | 0.025   | 0.005 |

|       |            |    |          |   |       |         |       |       |
|-------|------------|----|----------|---|-------|---------|-------|-------|
| SEPT3 | rs62241023 | 22 | 42385429 | G | 0.768 | 2.7E-06 | 0.025 | 0.005 |
|-------|------------|----|----------|---|-------|---------|-------|-------|

Locus is name of the gene in the closest proximity to the most associated SNV.

MAP = mean arterial pressure; SNV = single-nucleotide variant; CHR = chromosome; BP = base pair position (Build 37); EA = effect allele; EAF = effect allele frequency; P = *P*-value (standard infinitesimal mixed model);  $\beta$  = effect-size estimates on an inverse-normal transformed scale after adjustments for age, age<sup>2</sup>, sex, weight, stiffness device used and array, smoking and MAP; SE = standard error

**Supplementary Table S4** GTEx analysis of genome-wide significant loci associated with ASI (FDR < 0.05)

| <b>Locus</b> | <b>CHR</b> | <b>BP</b> | <b>Risk allele</b> | <b>Tissue</b>                   | <b>eQTL gene</b> | <b>GTEx P-value</b> |
|--------------|------------|-----------|--------------------|---------------------------------|------------------|---------------------|
| C1orf21      | 1          | 184182110 | T                  | Brain – cerebellar hemisphere   | APOBEC4          | 1.87E-05            |
|              |            | 184183215 | A                  | Brain – cerebellar hemisphere   | APOBEC4          | 1.88E-05            |
|              |            | 184183215 | A                  | Tibial nerve                    | C1orf21          | 2.49E-05            |
| TEX41        | 2          | 145803003 | G                  | Aorta                           | ZEB2             | 3.85E-05            |
|              |            | 145811605 | A                  | Aorta                           | ZEB2             | 4.23E-05            |
|              |            | 145821133 | A                  | Aorta                           | ZEB2             | 5.09E-05            |
|              |            | 145821717 | T                  | Aorta                           | ZEB2             | 4.18E-05            |
| FOXO1        | 13         | 41202384  | A                  | Oesophagus – muscularis         | SLC25A15         | 2.18E-05            |
|              |            | 41133080  | G                  | Cells – transformed fibroblasts | SLC25A15         | 2.92E-07            |
|              |            | 41143190  | A                  | Cells – transformed fibroblasts | SLC25A15         | 2.04E-08            |
|              |            | 41185309  | A                  | Cells – transformed fibroblasts | SLC25A15         | 1.36E-06            |
|              |            | 41202384  | A                  | Cells – transformed fibroblasts | SLC25A15         | 5.25E-07            |
|              |            | 41209236  | G                  | Cells – transformed fibroblasts | SLC25A15         | 1.83E-06            |
|              |            | 41231556  | G                  | Cells – transformed fibroblasts | SLC25A15         | 5.08E-06            |
|              |            | 41245144  | A                  | Cells – transformed fibroblasts | SLC25A15         | 3.31E-06            |
|              |            | 41185309  | A                  | Skin – sun exposed lower leg    | SLC25A15         | 2.84E-05            |
|              |            | 41209236  | G                  | Skin – sun exposed lower leg    | SLC25A15         | 2.40E-05            |
|              |            | 41231556  | G                  | Skin – sun exposed lower leg    | SLC25A15         | 8.46E-06            |
|              |            | 41245144  | A                  | Skin – sun exposed lower leg    | SLC25A15         | 1.37E-05            |

**Supplementary Table S5** Other trait associations for ASI associated variants using PhenoScanner. Only results from variants in high LD ( $r^2 > 0.8$ ) and  $P$ -value  $< 5 \times 10^{-8}$  are shown

| SNV        | CHR | BP        | EA | Trait                                         | Ancestry | N       | Beta   | SE     | P        | Study           | Reference/<br>PMID |
|------------|-----|-----------|----|-----------------------------------------------|----------|---------|--------|--------|----------|-----------------|--------------------|
| rs1006923  | 2   | 145775399 | C  | Diastolic blood pressure                      | European | 317,756 | -0.016 | 0.0026 | 1.42E-09 | Neale B         | UKBB               |
| rs1006923  | 2   | 145775399 | C  | Mouth or teeth dental problems: dentures      | European | 336,138 | -0.006 | 0.0010 | 5.81E-11 | Neale B         | UKBB               |
| rs1006923  | 2   | 145775399 | C  | Pulse wave arterial stiffness index           | European | 109,813 | -0.027 | 0.0045 | 1.36E-09 | Neale B         | UKBB               |
| rs1006923  | 2   | 145775399 | C  | Pulse wave peak to peak time                  | European | 110,099 | 0.028  | 0.0046 | 1.35E-09 | Neale B         | UKBB               |
| rs1006923  | 2   | 145775399 | C  | Coronary artery disease                       | Mixed    | 547,261 | 0.035  | 0.0063 | 1.71E-08 | van der Harst P | 29212778           |
| rs10840457 | 11  | 10675738  | A  | Mean platelet volume                          | European | 173,480 | 0.028  | 0.0039 | 9.02E-13 | Astle W         | 27863252           |
| rs10840457 | 11  | 10675738  | A  | Diastolic blood pressure                      | European | 317,756 | 0.020  | 0.0027 | 2.40E-14 | Neale B         | UKBB               |
| rs10840457 | 11  | 10675738  | A  | Pain type experienced in last month: headache | European | 336,650 | -0.006 | 0.0010 | 2.34E-09 | Neale B         | UKBB               |
| rs10840457 | 11  | 10675738  | A  | Systolic blood pressure                       | European | 317,754 | 0.018  | 0.0026 | 1.42E-11 | Neale B         | UKBB               |
| rs7331212  | 13  | 41185309  | A  | Pulse wave peak to peak time                  | European | 110,099 | 0.028  | 0.0048 | 6.12E-09 | Neale B         | UKBB               |

SNV = single-nucleotide variant; CHR = chromosome; BP = base position (hg19); EA = effect allele; N = total number of individuals; SE = standard error; P =  $P$ -value; PMID = PubMed ID; UKBB = <http://www.nealelab.is/uk-biobank/>

### **Information on candidate genes highlighted at suggestive ASI loci**

In supplementary table S3, interesting candidate genes for ASI at suggestive loci are indicated. Firstly, the *DDR1* locus (rs9501489,  $P = 4.0 \times 10^{-6}$ ) encodes the discoidin domain receptor tyrosine kinase 1. Tyrosine kinase receptors are involved in cell migration, differentiation and extracellular matrix remodelling<sup>1</sup>. Interestingly, *DDR1* receptors have previously been reported to be involved in collagen synthesis. Secondly, the *FUCA1* gene region, where the variant rs149320025 also had suggestive genome-wide significance with ASI ( $P = 5.4.0 \times 10^{-7}$ ). *FUCA1* is a protein encoding gene for alpha-L-fucosidase 1, which is lysosomal enzyme involved in the breakdown of glycoproteins and glycolipids<sup>2</sup>. There are mutations in this gene with associations with lysosomal storage diseases and increased aortic stiffness have been reported in certain groups<sup>3</sup>.

### Supplementary references

1. Krohn, J. B. *et al.* Discoidin Domain Receptor-1 Regulates Calcific Extracellular Vesicle Release in Vascular Smooth Muscle Cell Fibrocalcific Response via Transforming Growth Factor- $\beta$  Signaling. *Arterioscler. Thromb. Vasc. Biol.* **36**, 525–33 (2016).
2. Willems, P. J., Seo, H.-C., Coucke, P., Tonlorenzi, R. & O'Brien, J. S. Spectrum of mutations in fucosidosis. *Eur. J. Hum. Genet.* **7**, 60–67 (1999).
3. Wens, S. C. A. *et al.* Increased aortic stiffness and blood pressure in non-classic Pompe disease. *J. Inherit. Metab. Dis.* **37**, 391–7 (2014).
